# Supplementary material for: Effect of the Latent Reservoir on the Evolution of HIV at the Within- and Between-Host Levels
Source: PLOS journal article supplement (doi:10.1371/journal.pcbi.1005228), 2017-01-19
Supplement: S2 (10.1371/journal.pcbi.1005228.s002) [file journal.pcbi.1005228.s002]

# Effect of the latent reservoir on the evolution of HIV at the within- and between-host levels

## Supporting Text S2

Hilje M. Doekes<sup>1,2</sup>, Christophe Fraser<sup>1,3</sup>, Katrina A. Lythgoe<sup>1,4,\*</sup>

<sup>1</sup> Department of Infectious Disease Epidemiology, Imperial College London, United Kingdom.

<sup>2</sup> Theoretical Biology, Utrecht University, The Netherlands.

<sup>3</sup> Oxford Big Data Institute, Li Ka Shing Centre for Health Information and Discovery, Nuffield Department of Medicine, University of Oxford, United Kingdom.

<sup>4</sup> Department of Zoology, University of Oxford, United Kingdom.

\* [katrina.lythgoe@zoo.ox.ac.uk](mailto:katrina.lythgoe@zoo.ox.ac.uk).

### Modelling preferential transmission of ancestral virus

It has been argued that upon transmission of HIV, ancestral virus might be preferentially transmitted. We adjusted the within-host and between-host model to incorporate this possibility. We assume that during the within-host evolutionary process the virus acquires certain mutations that lower its transmissibility relative to the other viral strains present in the host, up to a certain maximum number of mutations  $m$ . The overall transmissibility of a host is not affected by these mutations. In addition, these mutations are assumed to be neutral at the within-host level, and are not linked to the mutations that increase the replication rate and/or virulence.

Let  $x_j^k(\tau)$  and  $y_j^k(\tau)$  be the frequency of strain  $j$  carrying  $k$  of these transmissibility-lowering mutations in the active compartment and the reservoir, respectively. Define the vectors

$$\mathbf{x} = (x_1^0, x_1^1, \dots, x_1^m, x_2^0, x_2^1, \dots, x_n^m), \quad (\text{S2.1})$$

$$\mathbf{y} = (y_1^0, y_1^1, \dots, y_1^m, y_2^0, y_2^1, \dots, y_n^m). \quad (\text{S2.2})$$

Let  $\mu_{\theta+}$  be the rate at which transmissibility-lowering mutations occur during replication, and let these mutations be reverted at rate  $\mu_{\theta-}$ . The within-host system is then again described by Eq 2 (main text), however now with

$$Q = \begin{pmatrix} \tilde{q}_{11}J & \cdots & \tilde{q}_{1n}J \\ \vdots & \ddots & \vdots \\ \tilde{q}_{n1}J & \cdots & \tilde{q}_{nn}J \end{pmatrix}, \quad (\text{S2.3})$$

where  $\tilde{q}_{ij} = m_{ij}\gamma_j$  is the entry in the original replication-mutation matrix and

$$J = \begin{pmatrix} (1 - \mu_{\theta+}) & \mu_{\theta-} & 0 & \cdots & 0 & 0 \\ \mu_{\theta+} & (1 - \mu_{\theta+} - \mu_{\theta-}) & \mu_{\theta-} & \cdots & 0 & 0 \\ \vdots & \vdots & \vdots & \ddots & \vdots & \vdots \\ 0 & 0 & 0 & \cdots & \mu_{\theta+} & (1 - \mu_{\theta-}) \end{pmatrix} \quad (\text{S2.4})$$

represents the acquisition of transmissibility-lowering mutations within a strain. The initial infecting strain is assumed to carry none of the transmissibility-lowering mutations, such that for a type- $j$  infection at  $\tau = 0$ ,  $x_j^0(0) = y_j^0(0) = 1$  and all other vector entries are zero. Using these initial conditions, the within-host equations can again be numerically integrated to calculate the frequencies of strain  $i$  carrying  $k$  transmissibility-lowering mutations in the active compartment and the reservoir,  $x_{ij}^k(\tau)$  and  $y_{ij}^k(\tau)$ , for an infection established by strain  $j$  at time  $\tau = 0$ .

Next, we again define the strain specific infectivity profile  $\beta_{ij}(\tau)$ . The relative contribution of strains to the infectivity now depends both on their frequency and the number of transmissibility-lowering mutations they carry. Let  $\theta_k$  represent the relative transmissibility of a strain with  $k$  transmissibility-lowering mutations compared to a strain without these mutations (i.e.  $\theta_0 = 1$ ). Then, we can define

$$\beta_{ij}(\tau) = \alpha_j(t) \frac{\sum_{k=0}^m \theta_k x_{ij}^k(\tau)}{\sum_{i=1}^n \sum_{k=0}^m \theta_k x_{ij}^k(\tau)}. \quad (\text{S2.5})$$

Here, the denominator ensures that the total infectivity does not reduce over time. Only the relative transmissibility of strains carrying a certain number of transmissibility-lowering mutations is affected. Relative transmissibility is assumed to decrease linearly with the number of transmissibility-lowering mutations, up to a certain minimum  $\theta_{min}$ . I.e.

$$\theta_k = \max(\theta_{min}, 1 - k\theta_{step}), \quad (\text{S2.6})$$

where  $\theta_{step}$  is the slope of the decrease. The strain specific infectivity profiles as described by Eq S2.5 were used to directly implement the preferential transmission mechanism in the between-host model described by Eqs 8-11 (main text).
